# Supplementary material for: Cdt1 stabilizes an open MCM ring for helicase loading
Source: PubMed Central journal article supplement (PMC5490006; doi:10.1038/ncomms15720), 2017-06-23
Supplement: ncomms15720-s1.pdf [file ncomms15720-s1.pdf]

## **Description of Supplementary Files**

File name: Supplementary Information

Description: Supplementary figures, supplementary tables, supplementary methods and supplementary references.

File name: Supplementary Movie 1

Description: Building a MCM-Cdt1 molecular model. Docking of MCM and Cdt1 atomic structures into the ATPyS MCM-Cdt1 EM density.

File name: Supplementary Movie 2

Description: MCM loading promotes Cdt1 ejection. Structural transition from the pre-catalytic MCM-Cdt1 to the post-catalytic (loaded) MCM involves ORC-Cdc6 mediated MCM planarization and ATP-hydrolysis AAA+ tier rotation, resulting in closure of the Mcm2-5 gate and Cdt1 ejection.

File name: Peer review file

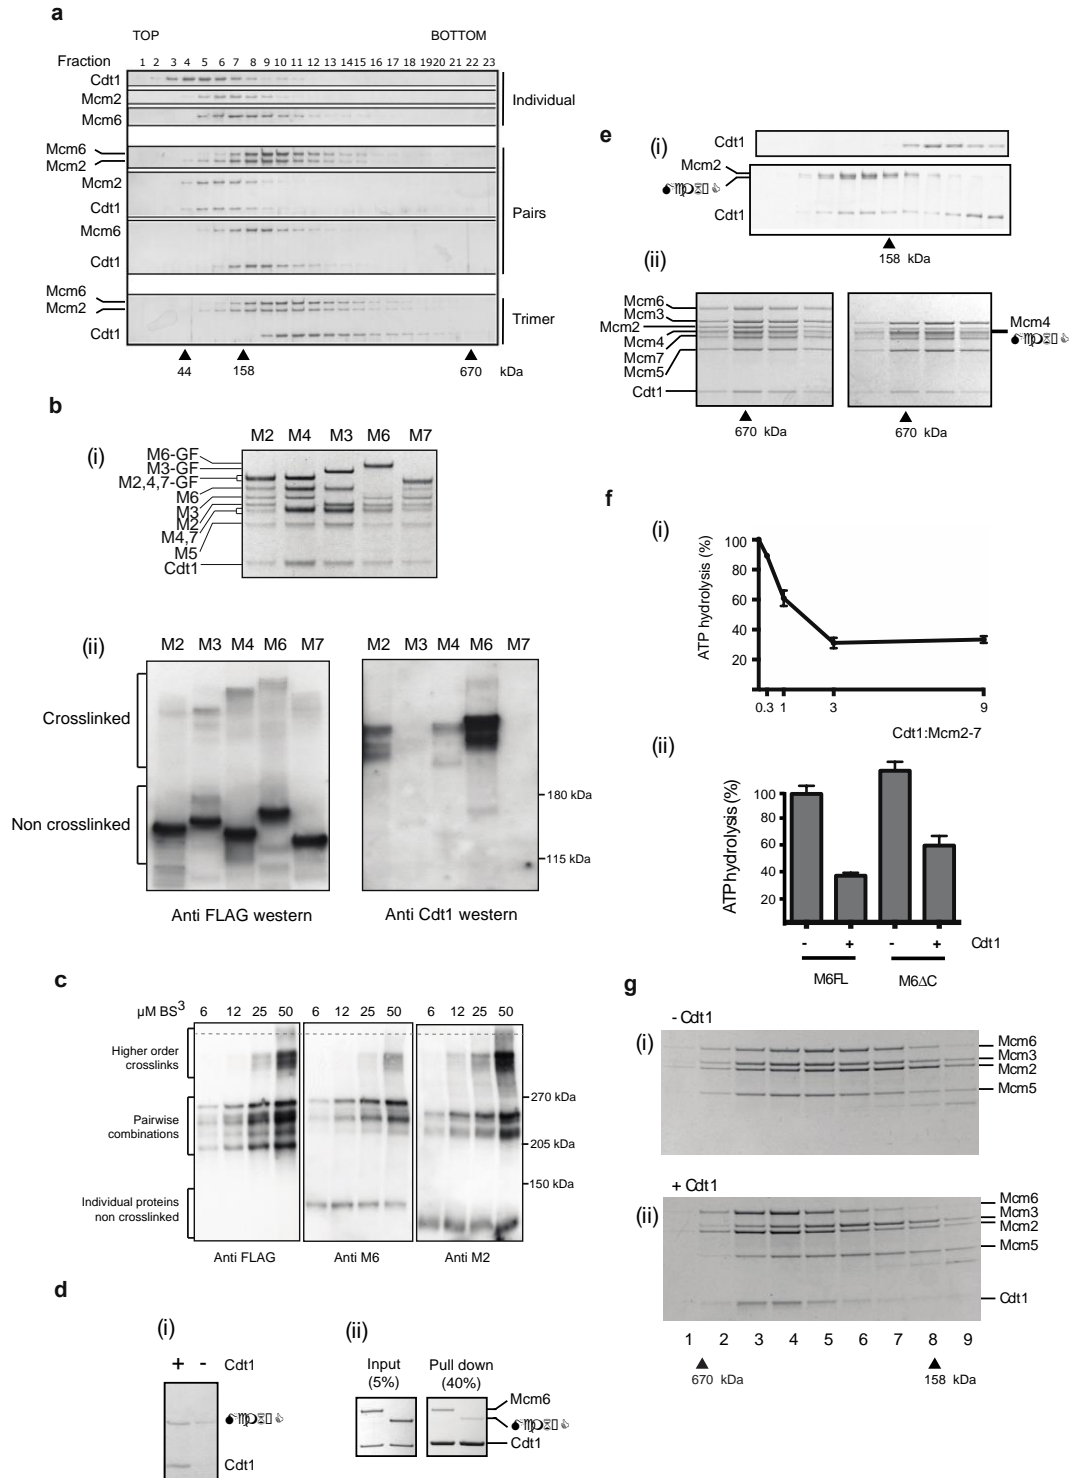

### **Supplementary Figure 1**

(a) Cdt1 forms stable trimer with Mcm2 and 6. Glycerol Gradient sedimentation of individual Cdt1, Mcm2 and Mcm6 proteins (upper panels); Pairs of Mcm2-Mcm6, Mcm2-Cdt1 and Mcm6-Cdt1 (middle panels); Trimer of Mcm2-Mcm6-Cdt1 (bottom panel). (b) Crosslinking of Cdt1 with different MCM complexes, where individual Mcm have been double tagged with GFP and FLAG (MCM GFP,FLAG - Cdt1 complexes). M's above gels denote which Mcm has been tagged in the MCM-Cdt1 complex. (i) Silver staining of the different complexes (GF on the left indicates position where tagged individual Mcm's run on the gel). (ii) Immunoblot analysis of the crosslinked complexes. Anti-FLAG antibody used as an input control and anti-Cdt1 shows which MCM GFP,FLAG-Cdt1 was able to crosslink Cdt1 after anti FLAG denaturing IP. (c) Identification by immunoblotting of different Mcm-Cdt1 FLAG pairwise combinations showed in Figure 1b (anti FLAG denotes Cdt1 and anti M6 and M2 show crosslinked Mcm6 and 2 with Cdt1, respectively). (d) Cdt1 is able to interact with Mcm6 $\Delta$ C. (i) FLAG pull down analysis of Cdt1 FLAG with M6 $\Delta$ C. Minus Cdt1 sample was used as a negative control. (ii) Side by side pull down analysis of Cdt1 FLAG with Mcm6 fl and  $\Delta$ C. (e) Cdt1 forms stable higher molecular complexes with Mcm6  $\Delta$ C (i). Gel filtration analysis of individual Cdt1 (upper panel) and together with Mcm2 and 6  $\Delta$ C (lower panel). (ii) Cdt1 forms a higher molecular weight complex with both Mcm6 fl (left) or  $\Delta$ C (right), as shown by gel filtration. (f) Cdt1 inhibits ATPase activity of MCM complex. (i) Inhibition of MCM ATPase activity with increasing molar ratios of Cdt1:MCM. (ii) Cdt1 inhibits activity of both MCM complexes (Mcm6 fl and  $\Delta$ C). The assays were done at Cdt1:MCM molar ratio of 3. (g) Gel filtration analysis of stable tetrameric Mcm6-2-5-3 complexes, with or without Cdt1.

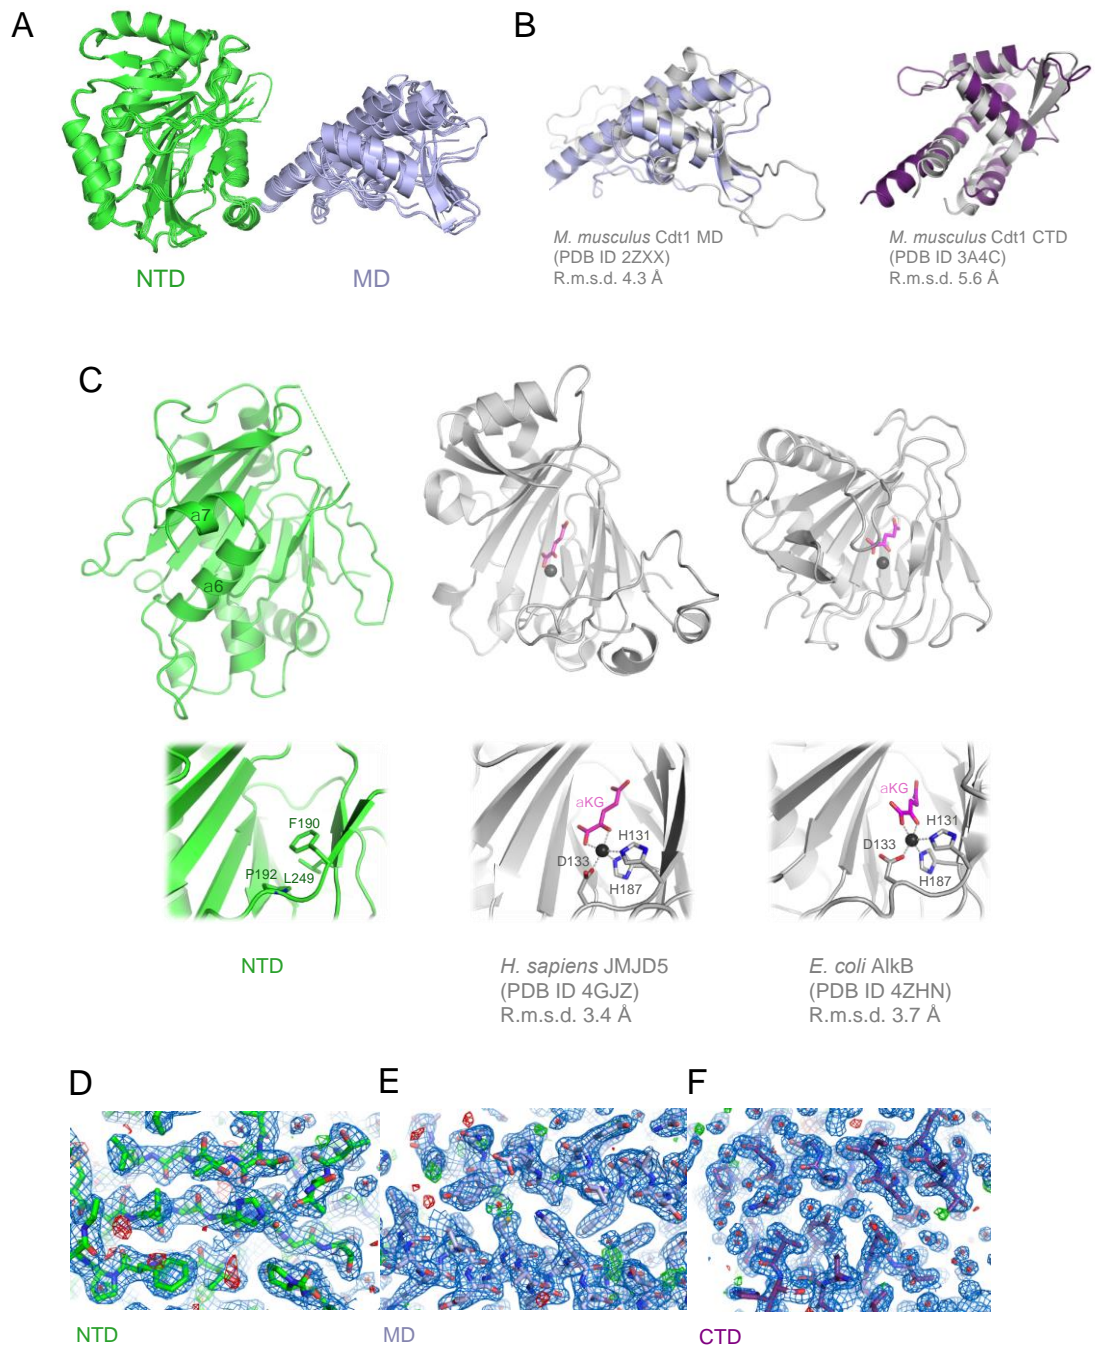

### Supplementary Figure 2

Superposition of four independently observed protein chains in crystals of Cdt1(1-438, NM); root mean square deviation (r.m.s.d.) values for C $\alpha$  atom positions in pairwise superpositions of the chains ranged between 0.46 and 1.1 Å. The domains are colored as in Figure 2. (B) Superposition of the *S. cerevisiae* with *M.*

*musculus* Cdt1 M domain (left) and CTD (right) WHD domains; the mouse Cdt1 structures are shown in grey. (C) Comparison of the *S. cerevisiae* Cdt1 N domain structure (left), human Lys demethylase JMJD5 (PDB entry 4GJZ, middle) and *E. coli* AlkB DNA dealkylase (PDB entry 4ZHN, right). Bottom panels show zoomed views corresponding to active site area of the dioxygenase fold, with selected residues in sticks and indicated. Grey spheres are metal ions (represented by  $\text{Co}^{2+}$  in the JMJD5 and AlkB structures), and dashes indicate coordination bonds;  $\alpha$ -ketoglutarate is shown as sticks with carbon atoms in magenta. Note that in the Cdt1 N domain, the critical His and Asp residues involved in metal ion chelation (His131, Asp133, and His187 in JMJD5 and AlkB) are replaced with amino acid residues not capable of metal chelation (Phe190, Pro192 and Leu249, respectively). (D-F) Representative electron density maps of the Cdt1 crystal structures. 2Fo-Fc maps are contoured at 1 sigma (blue); Fo-Fc maps are contoured at 3 sigma (positive, green; negative, red). D. shows Cdt1 N-terminal in green sticks. E. shows Cdt1 middle domain in light blue sticks. F. shows Cdt1 C-terminal domain in violet sticks.

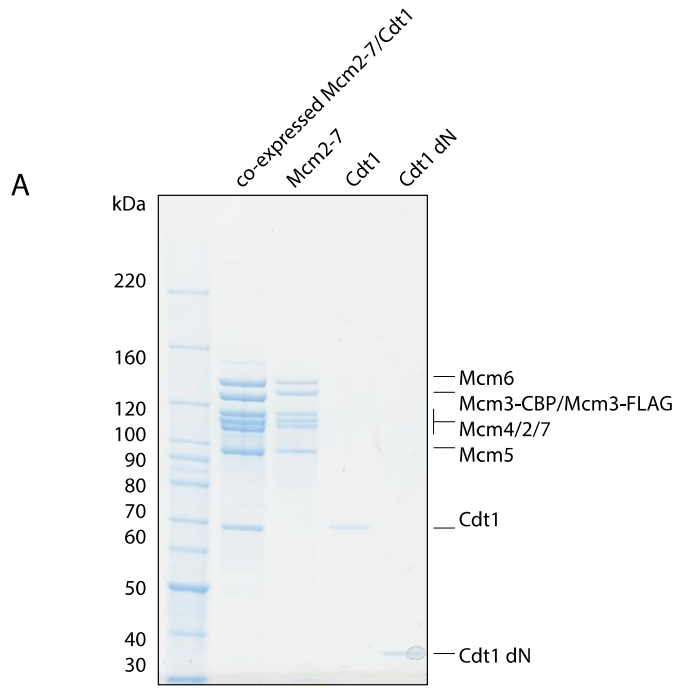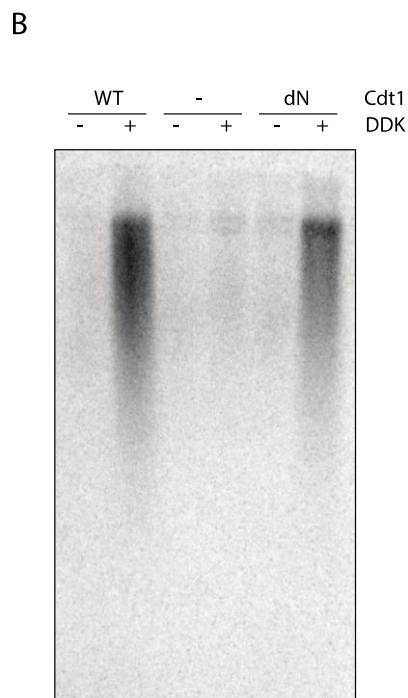

**Supplementary Figure 3.**

(A) Coomassie-stained SDS-PAGE of purified proteins used to reconstitute Cdt1-MCM complexes: co-expressed Cdt1-MCM (lane 1), Mcm2-7 (lane 2), Cdt1 WT (lane 3), Cdt1MC (lane 4).

(B) Alkaline agarose gel of DDK-dependent replication products after *in vitro* replication assays using S-phase whole-cell extract. Cdt1-MCM complexes were reconstituted with either WT Cdt1 (lanes 1+2), no Cdt1 (lanes 3+4) or Cdt1MC (lanes 5+6). Differences in loading efficiency were not corrected, resulting in reduced replication efficiency in the presence of Cdt1MC (lane 6), and complete loss of replication when omitting Cdt1 (lane 4), compared to WT Cdt1 (lane 2).

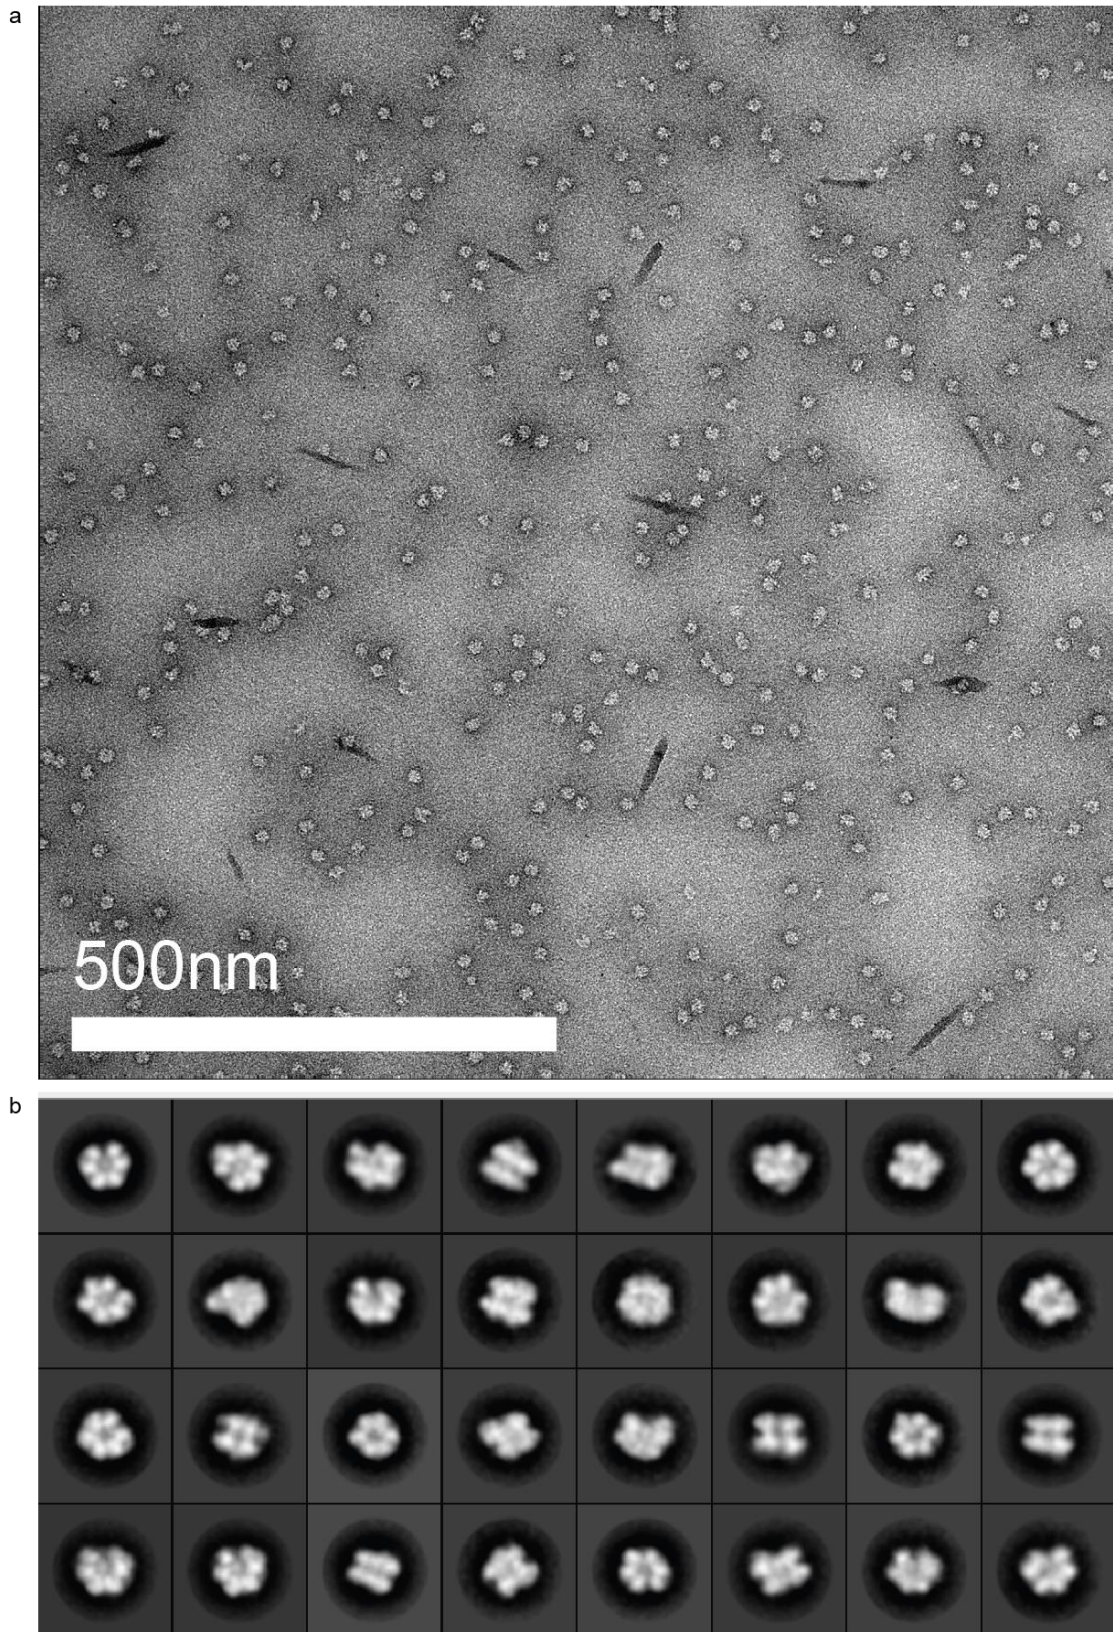



**Supplementary Figure 4. Electron microscopy imaging of apo MCM particles.**

(A) Characteristic micrograph of negatively stained MCM particles. (B) Two-dimensional classification reveals the presence of a mixed population of open and closed MCM rings.

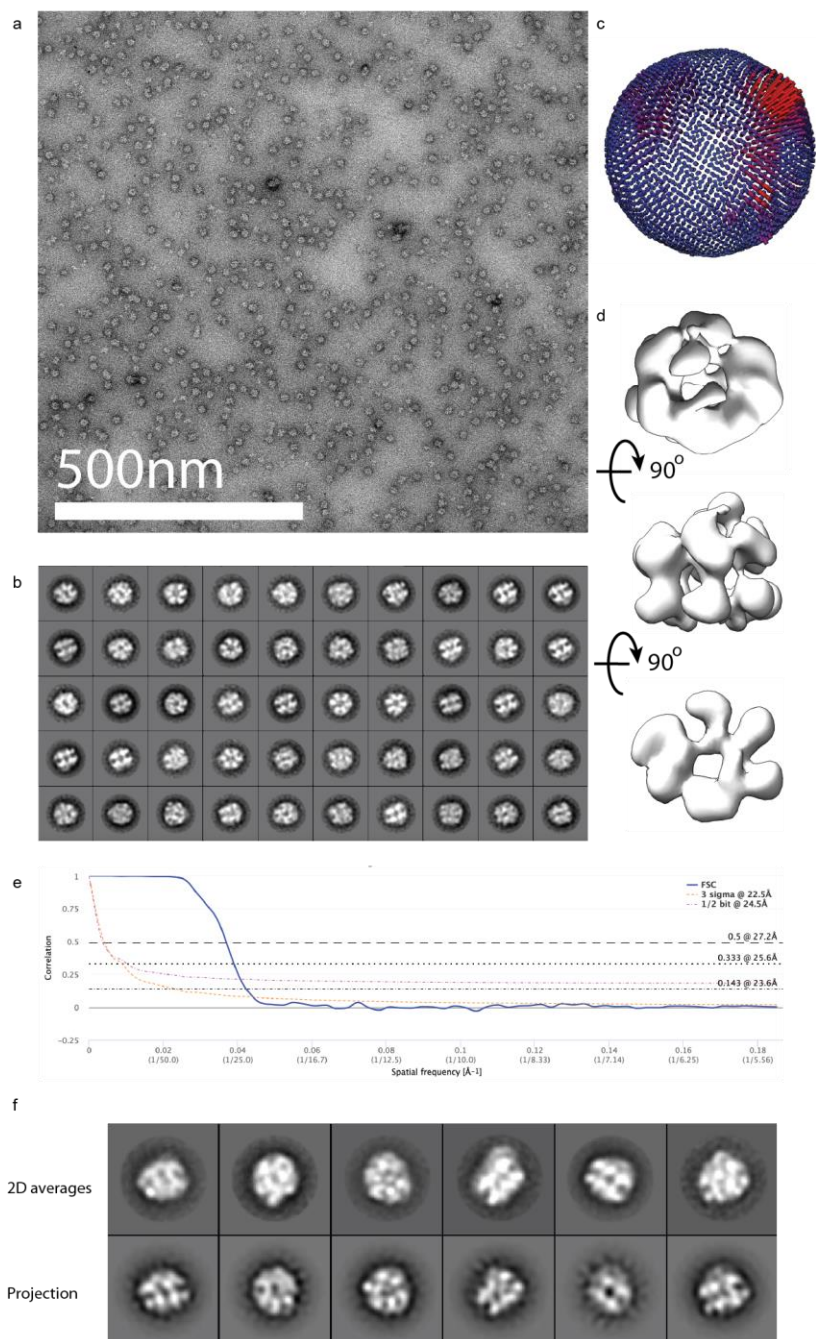

**Supplementary Figure 5. Electron microscopy imaging of ATPyS-MCM particles.**

(A) Characteristic micrograph of negatively stained MCM particles. (B) Two-dimensional classification indicates that ATPyS binding stabilises a closed configuration of MCM rings. (C) Euler angle distribution. (D) Three-dimensional

structure of ATP $\gamma$ S-MCM reveals a closed planar ring. (E) Fourier-shell correlation indicates a resolution of 23.6 Å according to the 0.143 criterion. (F) Match between reference free class averages and 2D re-projections.

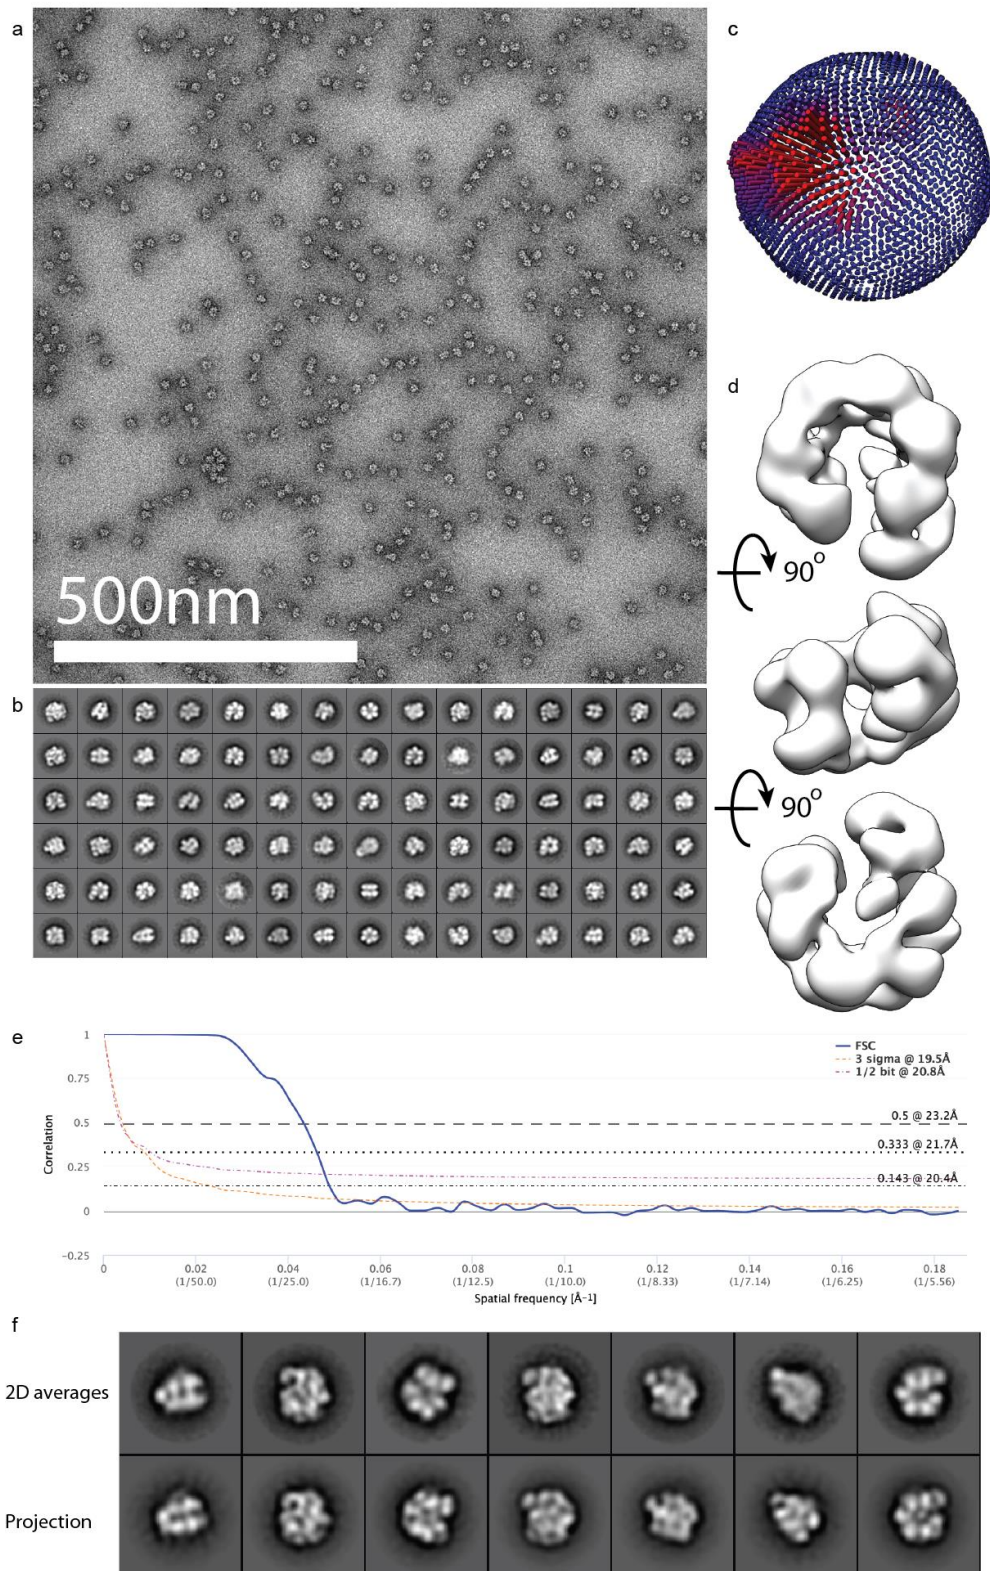

**Supplementary Figure 6. Electron microscopy imaging of apo Cdt1-MCM.**

(A) Characteristic micrograph of negatively stained particles. (B) Two-dimensional classification indicates that Cdt1-bound, apo MCM particles form stable open rings. (C) Euler angle distribution. (D) Three-dimensional structure of apo Cdt1-MCM reveals a left-handed spiral MCM structure. (E) Fourier-shell correlation indicates a resolution of 20.4 Å according to the 0.143 criterion. (F) Match between reference free class averages and 2D re-projections.

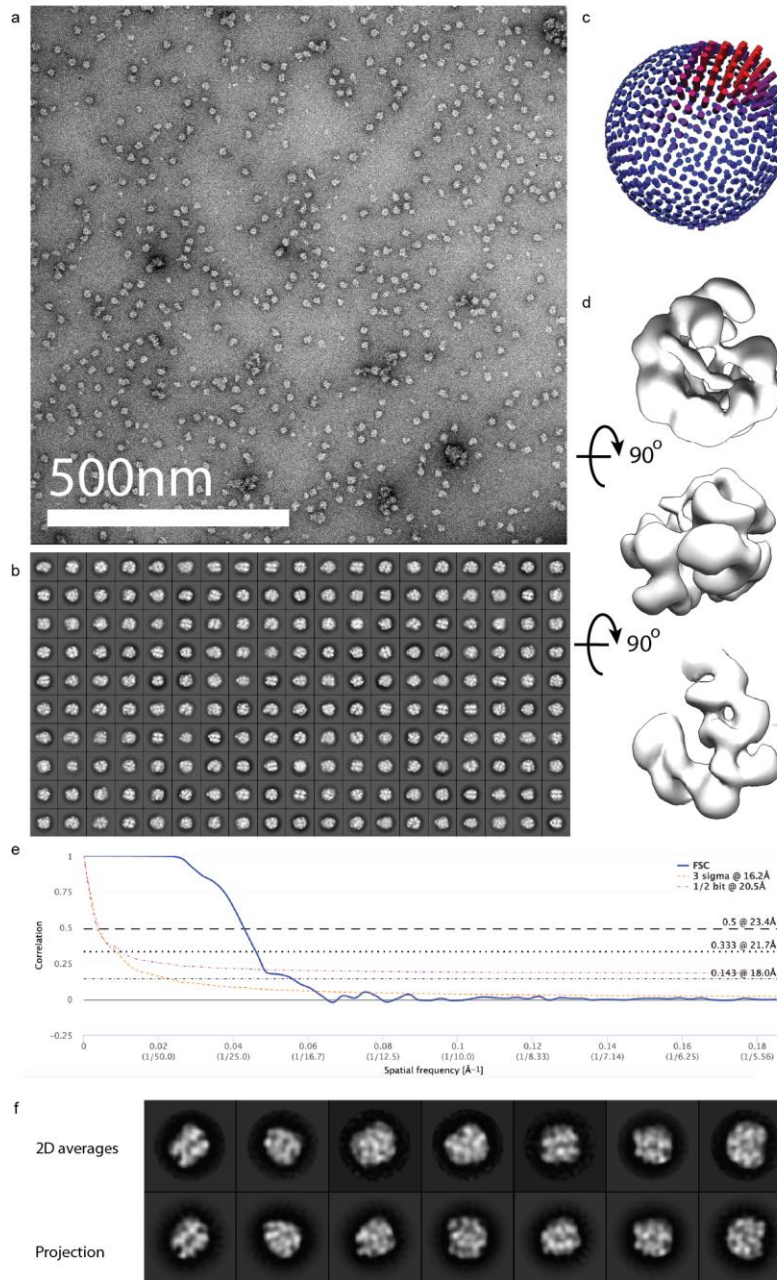

**Supplementary Figure 7. Electron microscopy imaging of ATP $\gamma$ S-Cdt1-MCM.**

(A) Characteristic micrograph of negatively stained particles. (B) Two-dimensional classification indicates that Cdt1-bound, ATP $\gamma$ S-MCM particles form stable open rings. (C) Euler angle distribution. (D) Three-dimensional structure of ATP $\gamma$ S-Cdt1-MCM reveals a left-handed spiral MCM structure. (E) Fourier-shell

correlation indicates a resolution of 20.4 Å according to the 0.143 criterion. (F) Match between reference free class averages and 2D re-projections.

Frigola/He et al. Supplementary Figure 8

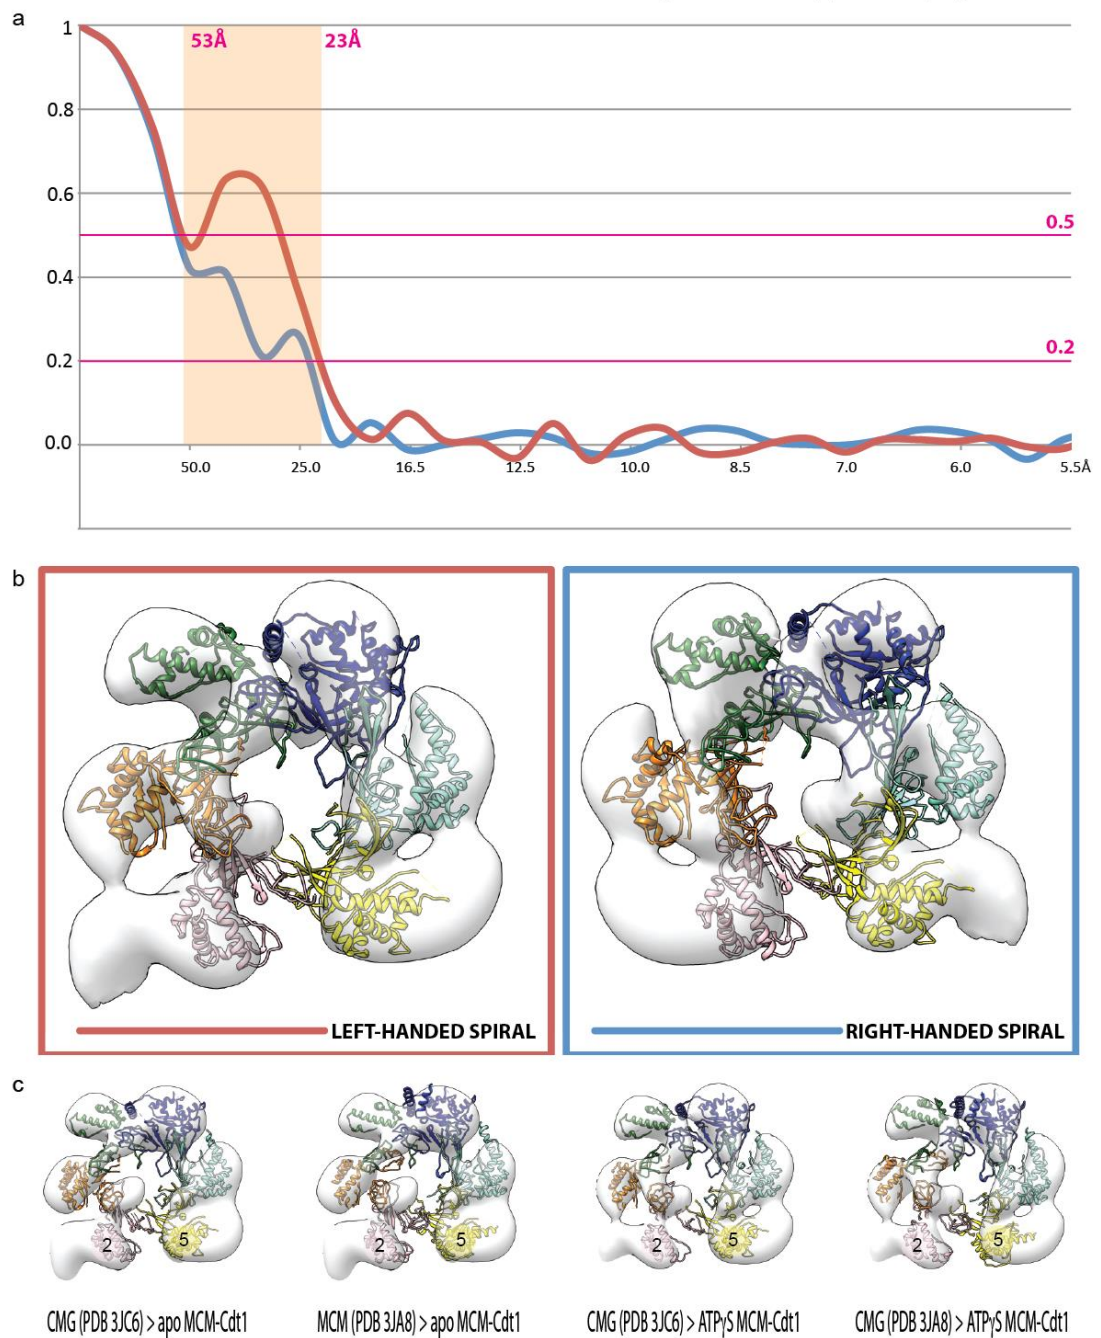

**Supplementary Figure 8: handedness and ring subunit register of the ATP $\gamma$ S-Cdt1-MCM structure.**

(A) Fourier-shell correlation between the N-terminal domain of MCM and the atomic structure of the yeast MCM N-terminal domain (extracted from the CMG

atomic model, PDB entry 3JC6). A left handed MCM spiral has higher correlation compared to a right-handed spiral, in the 53-23 Å resolution range (0.5-0.2 correlation interval). (B) The best docking solutions of the two mirrored N domain-MCM EM maps. (C) UCSF Chimera automated fitting of the atomic model of N domain-MCM extracted from the CMG or the MCM double hexamer, into the apo- or ATPγS-bound Cdt1-MCM indicates the same MCM ring subunit register (MCM gate maps between Mcm5 and Mcm2).

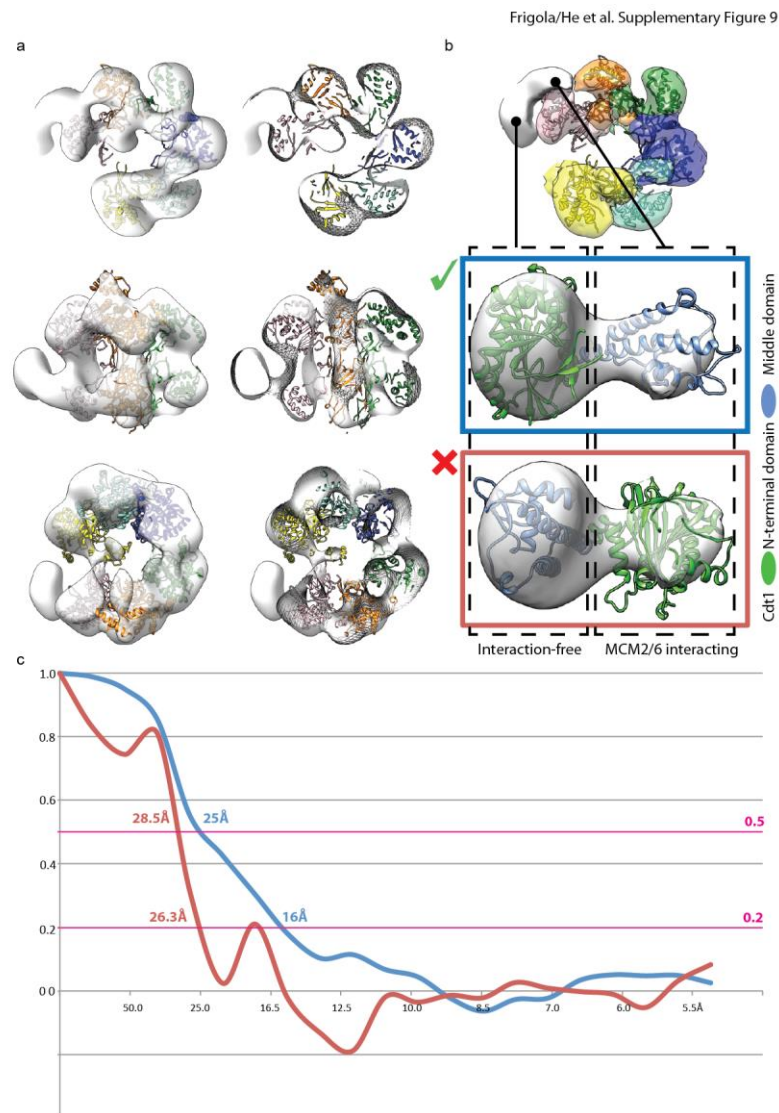

**Supplementary Figure 9. Cdt1-MCM atomic docking.**

(A) Local adjustment of MCM domains performed to accurately model the open ring configuration. Mcm2-6-4 N domain, Mcm2-6-4 AAA+, Mcm7-3-5 N domain



and Mcm7-3-5 AAA+ were treated as four independent rigid bodies. (B) Unoccupied density was assigned to Cdt1 and can be used for docking the structure of the N domain/middle domain of Cdt1. The best docking solution indicates that the N domain is free of any MCM interactions, while the middle domain interacts with Mcm2-6 (compatible with the results of the domain mapping experiment reported in Figure 1e). An alternative docking, with a lower-score, and Cdt1 rotated  $\sim 180^\circ$ , shows the N domain-Cdt1 contacting the MCM and the middle domain free of any MCM interaction. This second solution is incompatible with the domain mapping experiments. (C) Fourier shell correlation of the Cdt1 EM density vs an artificial electron density map generated from the docked coordinates. The best solution consistently gives a higher correlation across a large resolution range.

Frigola, He et al. Supplementary Figure 10

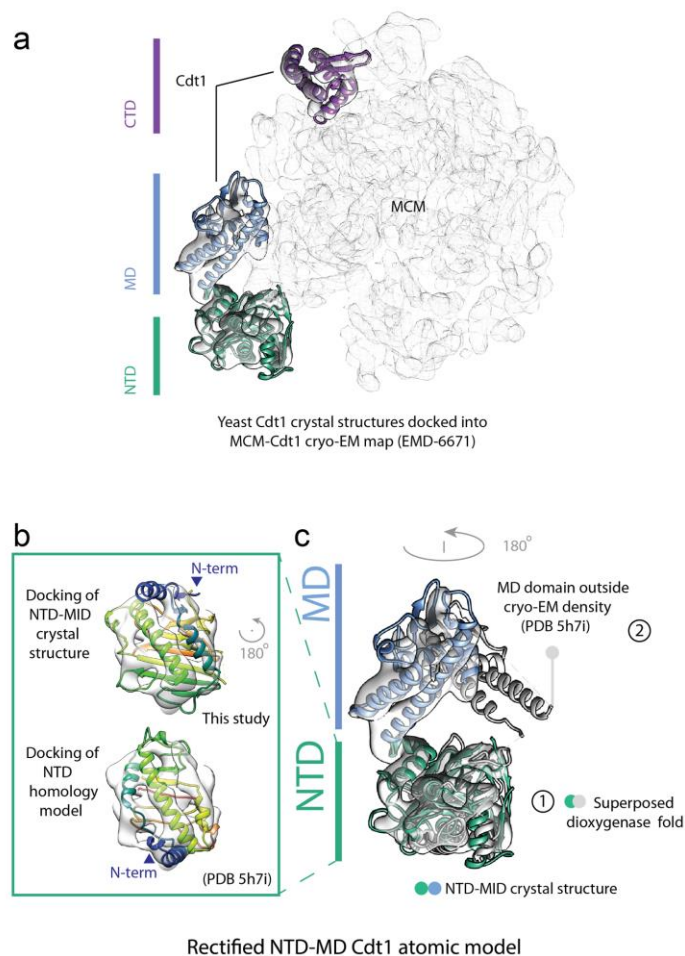

**Supplementary Figure 10. Comparison between the Cdt1 atomic models based on crystallography and cryo-EM.** The NTD/MD and the CTD crystallographic structures of yeast Cdt1 can be docked into the  $\sim 7.1$  Å resolution cryo-EM structure of yeast AMPPNP-MCM-Cdt1 (EMD-6671). The best docking solution for NTD/MD Cdt1 agrees with that based on our negative stain ATP $\gamma$ S-MCM-Cdt1. The crystallographic and cryo-EM atomic models of NTD-Cdt1 disagree, in that the dioxygenase fold is  $\sim 180^\circ$  rotated. As a consequence, the connectivity between NTD-MD Cdt1 is different and superposition of the two atomic model aids in clarifying this discrepancy. Docking of the NTD/MD Cdt1 crystal structure into the cryo-EM map is unequivocal, however NTD-based superposition of the previously published NTD-MD Cdt1 atomic model (PDB entry 5h7i) to the docked crystal structure shows that the MD-Cdt1 resides outside of the cryo-EM density.

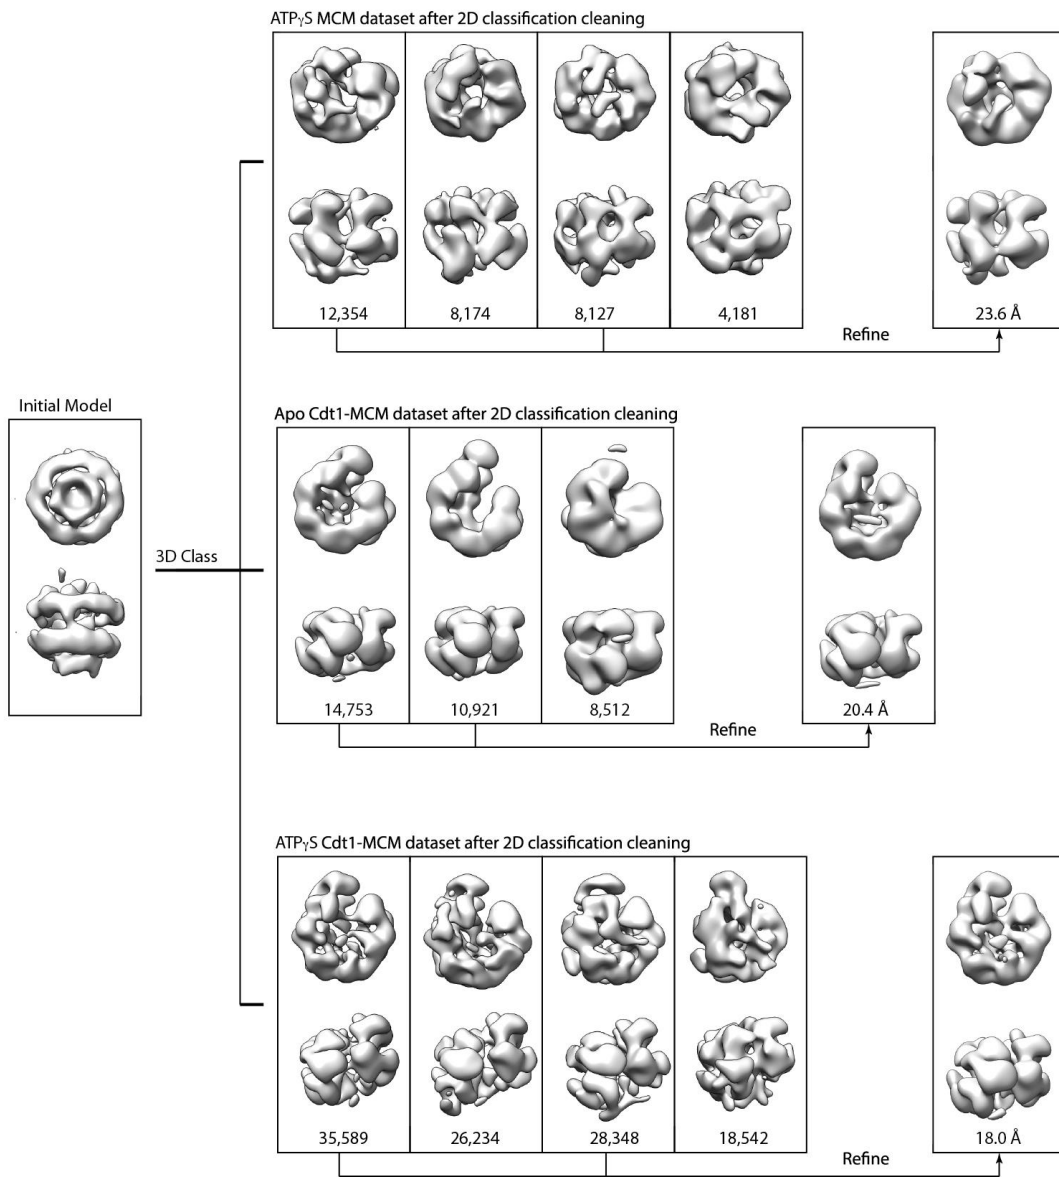

**Supplementary Figure 11. Overview of the three-dimensional classification and structure refinement.** The initial model is a planar MCM ring (i.e. the asymmetric unit from the negative stain structure of the MCM double hexamer<sup>1</sup>). Particles contributing to the two better-defined 3D classes in each dataset were used for 3D refinement.

Frigola/He Supplementary Table 1

| #           | Visible? | Starred? | Identified    | Protein Accession | Molecular Weight | Protein Group | Quantitative | Taxonomy                | Uncategorized | Uncategorized | Uncategorized | Uncategorized | Sample      |
|-------------|----------|----------|---------------|-------------------|------------------|---------------|--------------|-------------------------|---------------|---------------|---------------|---------------|-------------|
| END OF FILE | TRUE     | TRUE     | DNA replicat  | MCM6_YEAS         | 113 kDa          | TRUE          | unknown      | CSM4589A11              | 12            | 17            | 20            | 27            | BioSample 1 |
| 2           | TRUE     | TRUE     | Cell division | CDC54_YEAS        | 105 kDa          | TRUE          | unknown      | CSM4589A21              | 22            | 10            | 10            | 10            | BioSample 1 |
| 3           | TRUE     | TRUE     | DNA replicat  | MCM2_YEAS         | 99 kDa           | TRUE          | unknown      | CSM4589A31              | 6             | 12            | 14            | 9             | BioSample 1 |
| 4           | TRUE     | TRUE     | Uncharacteri  | YJ16_YEAS         | 68 kDa           | TRUE          | unknown      | CSM4589A41              | 10            | 12            | 12            | 7             | BioSample 1 |
| 5           | TRUE     | TRUE     | Minichromos   | MCM5_YEAS         | 88 kDa           | TRUE          | unknown      | CSM4589A4R              | 5             | 5             | 4             | 5             | Raw         |
| 6           | TRUE     | TRUE     | DNA replicat  | MCM3_YEAS         | 108 kDa          | TRUE          | unknown      | CSM4589A4RW3            | 1             | 2             | 5             | 8             | Raw         |
| 7           | TRUE     | FALSE    | Cell division | A6ZLE4_YEAS       | 95 kDa           | FALSE         | unknown      | CSM4589A4RW3_JF_D11     | 1             | 2             | 0             | 4             | Raw         |
| END OF FILE | TRUE     | FALSE    | Cell division | A6ZLE4_YEAS       | 95 kDa           | FALSE         | unknown      | CSM4589A4RW3_JF_D11_RAW | 1             | 2             | 0             | 4             | (F035247)   |

  

| SUMMARY |      |             |    |            |
|---------|------|-------------|----|------------|
|         |      | Bottom band | 3  | Top band 4 |
| 113 kDa | M6   | 12          | 17 | 27         |
| 105 kDa | M4   | 22          | 10 | 10         |
| 99 kDa  | M2   | 6           | 12 | 9          |
| 68 kDa  | Cdt1 | 10          | 12 | 7          |
| 88 kDa  | M5   | 5           | 5  | 4          |
| 108 kDa | M3   | 1           | 2  | 8          |
| 95 kDa  | M7   | 1           | 2  | 4          |

**Supplementary Table 1.** Summary of Mass spectrometry data from protein cross-linking experiments.

Table S2 X-ray data collection and refinement statistics.

|                                                           | <b>Cdt1(1-438)</b><br>Crystal form 1          | <b>Cdt1(1-438)</b><br>Crystal form 2          | <b>Cdt1(495-604)</b>                          |
|-----------------------------------------------------------|-----------------------------------------------|-----------------------------------------------|-----------------------------------------------|
| <b>Data collection:</b>                                   |                                               |                                               |                                               |
| Wavelength (Å)                                            | 0.97934                                       | 0.97856                                       | 0.97246                                       |
| Space group                                               | P2 <sub>1</sub> 2 <sub>1</sub> 2 <sub>1</sub> | P2 <sub>1</sub> 2 <sub>1</sub> 2 <sub>1</sub> | P2 <sub>1</sub> 2 <sub>1</sub> 2 <sub>1</sub> |
| Unit cell parameters                                      |                                               |                                               |                                               |
| <i>a</i> , <i>b</i> , <i>c</i> (Å)                        | 82.9, 122.5, 148.4                            | 47.5, 89.35, 121.9                            | 43.9, 85.9, 89.0                              |
| $\alpha$ , $\beta$ , $\gamma$ (°)                         | 90, 90, 90                                    | 90, 90, 90                                    | 90, 90, 90                                    |
| Number of crystals used                                   | 1                                             | 1                                             | 1                                             |
| Resolution (Å)                                            | 74-2.70 (2.85-2.70) <sup>a</sup>              | 42-2.15 (2.26-2.15)                           | 45-1.80 (1.85-1.80)                           |
| Number of reflections                                     |                                               |                                               |                                               |
| measured                                                  | 474,554                                       | 155,597                                       | 576,345                                       |
| unique                                                    | 42,303                                        | 26,255                                        | 31,963                                        |
| Completeness (%)                                          | 100 (100)                                     | 98.7 (95.4)                                   | 99.6 (98.9)                                   |
| Multiplicity                                              | 11.2 (11.6)                                   | 5.8 (5.8)                                     | 18.0 (18.4)                                   |
| $\langle I/\sigma(I) \rangle$                             | 15.8 (2.2)                                    | 13.1 (2.0)                                    | 20.2 (1.9)                                    |
| R <sub>merge</sub>                                        | 0.12 (1.40)                                   | 0.098 (1.06)                                  | 0.11 (1.91)                                   |
| R <sub>pin</sub> (all I <sup>+</sup> and I <sup>-</sup> ) | 0.038 (0.409)                                 | 0.043 (0.464)                                 | 0.03 (0.46)                                   |
| <b>SAD phasing statistics:</b>                            |                                               |                                               |                                               |
| No. of Se sites refined                                   | 23                                            |                                               | 17                                            |
| FOM (autosol)                                             | 0.28                                          |                                               | 0.34                                          |
| Model-map CC (autosol)                                    | 0.49                                          |                                               | 0.82                                          |
| <b>Refinement statistics:</b>                             |                                               |                                               |                                               |
| Resolution range (Å)                                      | 74-2.70 (2.80-2.70)                           | 42-2.15 (2.23-2.15)                           | 45-1.80 (1.86-1.80)                           |
| Number of reflections                                     |                                               |                                               |                                               |
| work set                                                  | 42,217                                        | 28,345                                        | 31,905                                        |
| free                                                      | 4,056                                         | 1,433                                         | 3,047                                         |
| R <sub>work</sub> /R <sub>free</sub>                      | 0.199/0.231                                   | 0.203/0.249                                   | 0.185/0.210                                   |
| Number of atoms                                           |                                               |                                               |                                               |
| total                                                     | 9,216                                         | 3,294                                         | 2,155                                         |
| protein                                                   | 9,071                                         | 3,092                                         | 1,826                                         |
| ligands                                                   | 53                                            | 26                                            | 10                                            |
| solvent                                                   | 92                                            | 176                                           | 319                                           |
| R.m.s. deviations from ideal                              |                                               |                                               |                                               |
| bond lengths (Å)                                          | 0.003                                         | 0.002                                         | 0.013                                         |
| bond angles (°)                                           | 0.77                                          | 0.61                                          | 1.25                                          |
| Average B-factor (Å <sup>2</sup> )                        | 81.4                                          | 56.1                                          | 31.6                                          |
| Ramachandran plot (%) <sup>b</sup>                        |                                               |                                               |                                               |
| favored                                                   | 97                                            | 98                                            | 97                                            |
| disallowed                                                | 0                                             | 0                                             | 0                                             |

<sup>a</sup> Values in parentheses correspond to the highest resolution bin.<sup>b</sup> Analyzed using MolProbity (<http://molprobity.biochem.duke.edu/>).**Supplementary Table 2.** Summary of X-ray crystallography data

Frigola/He Supplementary Table 3

| <b>Strain</b> | <b>Genotype</b>                                                                                                                      | <b>Reference</b>     |
|---------------|--------------------------------------------------------------------------------------------------------------------------------------|----------------------|
| yLD70         | <i>MATa ade2-1 ura3-1 his3-11 trp1-1::TRP1bar1 leu2-3::LEU2pep4 can1-100</i>                                                         | This study           |
| yJF8          | <i>MATa ade2-1 ura3-1 his3-11 trp1-1::TRP1bar1 leu2-3::LEU2pep4 can1-100 MCM2::MCM2-GFP(HIS3)</i>                                    | This study           |
| yJF9          | <i>MATa ade2-1 ura3-1 his3-11 trp1-1::TRP1bar1 leu2-3::LEU2pep4 can1-100 MCM4::MCM4-GFP(HIS3)</i>                                    | This study           |
| yJF10         | <i>MATa ade2-1 ura3-1 his3-11 trp1-1::TRP1bar1 leu2-3::LEU2pep4 can1-100 MCM6::MCM6-GFP(HIS3)</i>                                    | This study           |
| yJF28         | <i>MATa ade2-1 ura3-1 his3-11 trp1-1::TRP1bar1 leu2-3::LEU2pep4 can1-100 MCM7::MCM7-GFP(HIS3)</i>                                    | This study           |
| yJF29         | <i>MATa ade2-1 ura3-1 his3-11 trp1-1::TRP1bar1 leu2-3::LEU2pep4 can1-100 MCM3::MCM3-GFP(HIS3)</i>                                    | This study           |
| yJF12         | <i>MATa ade2-1 ura3-1 his3-11 trp1-1::TRP1bar1 leu2-3::LEU2pep4 can1-100 MCM2::MCM2-GFP(HIS3) MCM2-GFP::MCM2-GFP-3XFLAG(KANMX)</i>   | This study           |
| yJF13.1       | <i>MATa ade2-1 ura3-1 his3-11 trp1-1::TRP1bar1 leu2-3::LEU2pep4 can1-100 MCM4::MCM4-GFP(HIS3) MCM4-GFP::MCM4-GFP-3XFLAG(KANMX)</i>   | This study           |
| yJF14         | <i>MATa ade2-1 ura3-1 his3-11 trp1-1::TRP1bar1 leu2-3::LEU2pep4 can1-100 MCM6::MCM6-GFP(HIS3) MCM6-GFP::MCM6-GFP-3XFLAG(KANMX)</i>   | This study           |
| yJF30         | <i>MATa ade2-1 ura3-1 his3-11 trp1-1::TRP1bar1 leu2-3::LEU2pep4 can1-100 MCM7::MCM7-GFP(HIS3) MCM7-GFP::MCM7-GFP-3XFLAG(KANMX)</i>   | This study           |
| yJF31         | <i>MATa ade2-1 ura3-1 his3-11 trp1-1::TRP1bar1 leu2-3::LEU2pep4 can1-100 MCM3::MCM3-GFP(HIS3) MCM3-GFP::MCM3-GFP-3XFLAG(KANMX)</i>   | This study           |
| yJF59         | <i>W303 1a pep4::KanMx4 bar1::HphNT1 his3-11::[HIS3pJF2::Cdt1-3xFLAG::NAT NT2] trp1-1::TRP1pJF3leu2-3::LEU2pJF4 ura3-1::URA3pJF5</i> | Frigola et al., 2013 |
| yJF39         | <i>W303-1a pep4::KanMx4 bar1::Hph-NT1 his3-11::HIS3pJF2 trp1-1::TRP1pJF3</i>                                                         | Frigola et al., 2013 |

|                     |                                                                                                                                           |                         |
|---------------------|-------------------------------------------------------------------------------------------------------------------------------------------|-------------------------|
|                     | <i>leu2-3::LEU2pJF4 ura3-1::URA3pJF6<br/>CDT1::CDT1-TAP<sup>TCP</sup> (HIS3)</i>                                                          |                         |
| SD-ORC              | <i>W303-1a pep4::KanMx4 bar1::Hph-NT1<br/>his3-11::HIS3pJF17 trp1-1::TRP1pJF18<br/>ura3-1::URA3pJF19</i>                                  | Frigola et al.,<br>2013 |
| SD-ORC( $\Delta$ 6) | <i>W303-1a pep4::KanMx4 bar1::Hph-NT1<br/>his3-11::HIS3pJF17 trp1-1::TRP1pJF18<br/>ura3-1::URA3pJF19 ORC6::ORC6-<br/>3xFlag (Nat-NT2)</i> | Frigola et al.,<br>2013 |

**Supplementary Table 3.** Yeast strains used in this study.

Frigola/He Supplementary Table 4

| <b>Plasmid</b> | <b>Cloning Vector</b> | <b>Insert</b>           | <b>Reference</b> |
|----------------|-----------------------|-------------------------|------------------|
| pMAL-M6N       | pMAL-C2P              | <i>MCM6 1-1461bp</i>    | This study       |
| pMAL-M6C1      | pMAL-C2P              | <i>MCM6 1462-3051bp</i> | This study       |
| pMAL-M6C2      | pMAL-C2P              | <i>MCM6 2367-3051bp</i> | This study       |
| pET22b-M6ΔC    | pET22b                | <i>MCM6 1-2616bp</i>    | This study       |
| pETS-CNM       | Champion<br>pET SUMO  | <i>CDT1 1-1314bp</i>    | This study       |
| pETS-CMC       | Champion<br>pET SUMO  | <i>CDT1 813-1812bp</i>  | This study       |
| pETS-CM1       | Champion<br>pET SUMO  | <i>CDT1 813-1314bp</i>  | This study       |
| pETS-CM2       | Champion<br>pET SUMO  | <i>CDT1 813-1488bp</i>  | This study       |
| pETS-CC1       | Champion<br>pET SUMO  | <i>CDT1 1485-1812bp</i> | This study       |
| pETS-CC3       | Champion<br>pET SUMO  | <i>CDT1 1308-1812bp</i> | This study       |

**Supplementary Table 4.** Plasmids used in this study.



Frigola/He Supplementary Table 5

| <b>Primer</b> | <b>Sequence</b>                                                               | <b>Target</b> | <b>Direction</b> |
|---------------|-------------------------------------------------------------------------------|---------------|------------------|
| JF25          | CGC GGA TCC ATG TCA TCC CCT TTT CCA                                           | <i>MCM6</i>   | FOR              |
| JF26          | CCG AGG GTC GAC TTA ATT AGC AGC CAT                                           | <i>MCM6</i>   | REV              |
| JF27          | GGC GGA TCC ATG TTA CAA GCT AAT<br>AAT                                        | <i>MCM6</i>   | FOR              |
| JF28          | CTG GAC GTC GAC TTA GCT GGA ATC<br>CTG                                        | <i>MCM6</i>   | REV              |
| JF29          | GCG GGA TCC ATG AGT AGA TCG AGT<br>TAT                                        | <i>MCM6</i>   | FOR              |
| JF32          | GGTATGAGTGGCACAGCTAATAG                                                       | <i>CDT1</i>   | FOR              |
| JF33          | TCAATTAGAGCTGGACCTTC                                                          | <i>CDT1</i>   | REV              |
| JF34          | GGTATGAGTAAAGGAGAGGGTAC                                                       | <i>CDT1</i>   | FOR              |
| JF35          | TCAATCTTGTTGTTTTGATTTGTG                                                      | <i>CDT1</i>   | REV              |
| JF36          | TCAATTAGAGCTGGACCTTC                                                          | <i>CDT1</i>   | REV              |
| JF37          | TCATGCGCCGAACGTCTCTC                                                          | <i>CDT1</i>   | REV              |
| JF38          | GGTATGGCCGCATTGCTTTCTC                                                        | <i>CDT1</i>   | FOR              |
| JF39          | TCAATCTTGTTGTTTTGATTTGTG                                                      | <i>CDT1</i>   | REV              |
| JF40          | GGTATGGTACCCGCTTTCAAATA                                                       | <i>CDT1</i>   | FOR              |
| JF41          | GTGTTCCGCCCAACTCCGCAGGTCTTTCCG<br>TACCTTGGGTCACCGTACGCTGCAGGTCCG              | <i>MCM2</i>   | FOR              |
| JF42          | GAATTTTTATCTTCATATCCAGATATTCCG<br>TAGGAATAACAAAGTTTTAATCGATGAATT<br>CGAGCTCG  | <i>MCM2</i>   | REV              |
| JF43          | TGTCGGACAGAAATAACTTAATGGTTGCT<br>GACGATAAAGTTTGGAGAGTCCGTACGCT<br>GCAGGTCGAC  | <i>MCM3</i>   | FOR              |
| JF44          | AAAGCCAAGAATGGAAGTCTTTTAGTAAA<br>CATTCTGTGACATCAATCGATGAATTCG<br>AGCTCG       | <i>MCM3</i>   | REV              |
| JF45          | TTGTCCTTGGCGAGGGTGTAAAGGAGATCA<br>GTTCCGCTGAATAACCGTGTCCGTACGCT<br>GCAGGTCGAC | <i>MCM4</i>   | FOR              |
| JF46          | TAGTATTTATTAATTGTTACGCAGGGAATG<br>ATTGTAGTAGACAGCATCAATCGATGAAT<br>TCGAGCTCG  | <i>MCM4</i>   | REV              |
| JF47          | TTCATCCAACTGTGAGTTTTGGATCAAT<br>TGGAACACAGGATTCCAGCCGTACGCT<br>GCAGGTCGAC     | <i>MCM6</i>   | FOR              |
| JF48          | GAACGATACTTGAAACGAAATATGAAAT<br>CCGCAAGAGTGCACTGAATTAATCGATGA<br>ATTCCGAGCTCG | <i>MCM6</i>   | REV              |
| JF49          | TTCCGCTAATGTGAGCGCCCAAGATTCTG<br>ATATCGATCTACAAGACGCTCGTACGCTG<br>CAGGTCGAC   | <i>MCM7</i>   | FOR              |
| JF50          | AAAGAATAAAGAATGAAGGCCCTGTTGCT<br>TTTTTTTTAGAATTTCAATCGATGAATTC<br>GAGCTCG     | <i>MCM7</i>   | REV              |
| JF51          | AGTGTTCGCCCAACTCCGCAGGTCTTT<br>CGCAATTTATACCTTGGGTCACCGTACGC                  | <i>MCM2</i>   | FOR              |

|      |                                                                                        |              |     |
|------|----------------------------------------------------------------------------------------|--------------|-----|
|      | TGCAGGTCGAC                                                                            |              |     |
| JF52 | CACTATAGGGCGAATTGGAGCTCCACCG<br>CGGTGGCGGCCGCGCTTTATCAATCGAT<br>GAATTCGAGCTCG          | <i>pYM44</i> | REV |
| JF53 | TTGAAGATCATGTCGGACAGAAATAACTT<br>AATGGTTGCTGACGATAAAGTTTGGAGAG<br>TCCGTACGCTGCAGGTCGAC | <i>MCM3</i>  | FOR |
| JF54 | GGTCATTGTCCTTGGCGAGGGTGTAAAGG<br>AGATCAGTTCGCCTGAATAACCGTGTCCG<br>TACGCTGCAGGTCGAC     | <i>MCM4</i>  | FOR |
| JF55 | CCAAACTGTGAGGTTTTGGATCAATTGGA<br>ACCACAGGATTCCAGCCGTACGCTGCAG<br>GTCGAC                | <i>MCM6</i>  | FOR |
| JF56 | CGTCCTGCTCCCAGGGCTTCAAGCGTCTTG<br>TAGATCGATATCAGAATC                                   | <i>MCM7</i>  | FOR |
| NC7  | GGAAATGCATATGTCATCCCCTTTCCAG<br>CTGACAC                                                | <i>MCM6</i>  | FOR |
| NC8  | CCGCTCGAGTCATGACCCAGTCCCATCAT<br>CATTGTC                                               | <i>MCM6</i>  | REV |

**Supplementary Table 5.** Oligonucleotides used in this study.

## ***Supplementary Methods***

### ***Yeast Strains and Vectors***

#### Mcm6 fragments.

Mcm6 fragments were amplified by PCR using JF25-26, 27-28 and 29-28 primer pairs. These PCR products were cloned into pMAL-C2P to yield pMAL-Mcm6N, pMAL-Mcm6C1 and pMAL-Mcm6C2 between BamHI and Sal I. pMAL-C2P was derived from pMAL-C2 (NEB) by introducing a PreScission protease site before the EcoRI site in the polylinker region.

#### Mcm6 $\Delta$ C.

Mcm6 $\Delta$ C was amplified by PCR using NC7-8 primer pairs. This PCR product was cloned into pET22b (Invitrogen), between NdeI and XhoI, yielding in pET22b-Mcm6 $\Delta$ C.

#### Cdt1 fragments.

Cdt1 fragments were amplified using JF32-33, 34-35, 34-36, 34-37, 38-39 and 40-39. This PCR products were cloned into champion pET SUMO (Invitrogen) leading to pETS-CNM, CMC, CM1, CM2, CC1 and CC3 respectively.

#### MCM GFP,FLAG-Cdt1 complexes.

Using yLD70 as a background strain, Mcm2, 3, 4, 6 and 7 were GFP tagged using PCR products obtained from JF41-42, 43-44, 45-46, 47-48, 49-50 primer pairs and pYMcm44 vector as a template, yielding into yJF8, 29, 9, 10 and 28, respectively. An additional 3xFLAG tag was added using JF51-52, 53-52, 54-52, 55-52 and 56-52 primer pairs, yielding to yJF12, 31, 13.1, 14 and 30, respectively.

### ***Protein Purification***

#### Mcm6 fragments.

All expression plasmids were transformed into BL21 DE3 Codon+ RIL cells (Stratagene). 1.5 L of cells were grown at 37°C to a density of  $OD_{600}=0.5-0.8$ . Cells were chilled on ice, and then IPTG was added to 1 mM. Induction was carried out O/N at 18°C. Cells were harvested, washed once with ice-cold 25 mM Hepes-KOH pH 7.6, 1M sorbitol, once with buffer C (50 mM Tris-HCl pH 7.5, 0.05% NP-40, 10% glycerol), 1 M NaCl and then the pellet was resuspended in 20 ml of buffer C plus 1M NaCl, 2 mM  $\beta$ -mercapethanol, protease inhibitors (Roche). 25  $\mu$ l of lysozyme (50 mg/ml) were added and the suspension incubated for 20 minutes at 4°C. Cells were kept on ice and sonicated 3 x 30 sec at 15 microns using a sonicator Soniprep 150 (Sanyo). Lysate was centrifuged for 1 hour at 45,000 rpm using a Ti45 rotor. The soluble phase was collected and incubated with 1 ml packed amylose bead volume (NEB) at 4°C for 1 hour. Beads were washed with ten BVs of buffer C plus 0.3 M NaCl, 2 mM  $\beta$ -mercaptoethanol. Elution was performed with buffer C plus 0.3 M NaCl, 2 mM  $\beta$ -mercaptoethanol, 10 mM maltose. Peak fractions were pooled and 0.5 ml were subjected to fractionation over a Superdex 200 10/300 GL column (GE Healthcare) pre-equilibrated in buffer C plus 0.3 M NaCl, 2 mM  $\beta$ -mercaptoethanol. Peak fractions were diluted with buffer C plus 2 mM  $\beta$ -mercaptoethanol, pooled and concentrated on 0.15 ml MonoQ™ PC1.6/5 column (GE Healthcare), using an elution gradient of 0.15-0.5 M NaCl over 15 CVs. Peak fractions containing MBP-Mcm6 fragments were kept.

#### Mcm6 $\Delta$ C protein.

Cells were grown and expressed as described above. Cells were harvested, washed once with ice-cold 25 mM Hepes-KOH pH 7.6/1 M sorbitol, once with buffer D (50 mM Tris-HCl pH 7.5, 0.05% NP-40, 10% glycerol, 1mM EDTA and 1mM DTT) plus 1 M NaCl, and the pellet was resuspended in 40 ml of buffer D plus 1M NaCl, protease inhibitors (Roche). Cells were sonicated and the lysate centrifuged for 1 hour at 45000 rpm using a Ti45 rotor. The soluble fraction from centrifugation was treated

with 0.3 g/ml ammonium sulphate, and stirred for 20 minutes at 4°C. The mixture was centrifuged at 17,000 rpm for 20 minutes. The pellet was resuspended in 40 ml of buffer D containing 0.25 g/ml of ammonium sulphate and centrifuged as before. This was repeated with 0.20 mg/ml ammonium sulphate. The pellet was resuspended in 30 ml of buffer D and dialyzed against buffer D for one hour at 4°C. After checking that the conductivity of the sample was below that of buffer D plus 0.1 M NaCl, the sample was applied to a 5 ml FF Q column (GE Healthcare), pre-equilibrated in buffer D plus 0.1 M NaCl. Elution was done using a gradient of 0.1 M to 0.5 M NaCl over 10 CVs. Peak fractions were pooled and subjected to fractionation over a Superdex 200 10/300 GL column (GE Healthcare) pre-equilibrated with buffer D plus 0.3 M NaCl. Peak fractions were diluted with buffer D and subjected to 0.15 ml MonoQ™ PC1.6/5 column (GE Healthcare), using an elution gradient of 0.15-0.5 M NaCl over 15 CVs. Peak fractions containing Mcm6ΔC were kept.

#### Cdt1 fragments.

All expression plasmids were transformed into E. coli Rosetta2(DE3) cells (Novagen). 3 L of cells were grown at 30°C to a density of OD<sub>600</sub>=0.7-0.9. Protein expression was induced with 1mM IPTG for 4 hours. Cells were harvested by centrifugation. Cells were resuspended in buffer E (25mM Tris-HCl, pH 7.4) plus 0.5M NaCl, 1mM PMSF and disrupted using sonication. Sample was centrifuged for 30 minutes at 42,000rpm (Ti45 rotor). Supernatant was collected and 20mM imidazole was added. His<sub>6</sub>-tagged proteins were captured on His trap FF crude 5 ml column (Amersham) and eluted with buffer E plus 0.5M NaCl, 200mM imidazole. His<sub>6</sub>-SUMO tag was removed by overnight digestion with His<sub>6</sub>-tagged catalytic core domain of *S. cerevisiae* Ulp1, at 4°C with buffer E plus 0.3M NaCl. Non cleaved and Ulp1 proteins were removed using His trap FF crude 5 ml column (Amersham) and the flow through was diluted with buffer E and fractionated using 5ml Hi Trap FF Q column (GE healthcare) in the case of Cdt1 NM fragment, while the other Cdt1

fragments were subjected to Hi Trap FF SP column (GE healthcare) instead. Proteins were eluted with a linear 0.1-0.5M NaCl gradient in 25mM Tris-HCl, pH 7.4. Peak fractions were pooled and loaded into HiLoad 16/60 Superdex 200 column (GE healthcare) pre equilibrated with buffer E plus 0.1M NaCl, 2mM DTT and 10% glycerol was added to the samples and snap frozen in liquid nitrogen.

#### Cdt1-FLAG.

yJF59 strain overexpresses MCM-Cdt1 FLAG. During the fractionation of this complex in a HiLoad 16/60 Superdex 200 column (GE healthcare), later fractions eluted from the column containing Cdt1-FLAG as a monomer were pooled and stored.

#### Mcm2, Mcm7 and Mcm3.

To purify these proteins, we followed the protocol described by Davey et al., 2003 (ref 2). The starting cultures were 3 L in volume.

#### Mcm5, Mcm6, Mcm4 and Cdt1.

We followed the protocol described by Frigola et al., 2013 (ref 3). The starting cultures were 3 L in volume.

#### SD-ORC, yJF38, yJF39, yJF59 and Cdc6.

We followed the protocol described by Frigola et al., 2013 (ref 3).

#### MCM GFP,FLAG -Cdt1 complexes.

We followed the protocol described by Remus et al., 2009 (ref 1).

### **Supplementary References**

1. Remus, D. et al. Concerted loading of Mcm2-7 double hexamers around DNA during DNA replication origin licensing. *Cell* **139**, 719-30 (2009).
2. Davey, M.J., Indiani, C. & O'Donnell, M. Reconstitution of the Mcm2-7p heterohexamer, subunit arrangement, and ATP site architecture. *J Biol Chem* **278**, 4491-9 (2003).
3. Frigola, J., Remus, D., Mehanna, A. & Diffley, J.F.X. ATPase-dependent quality control of DNA replication origin licensing. *Nature* **495**, 339-43 (2013).
